# Supplementary material
Source: PubMed Central journal article supplement (PMC5325706)

Figure S4

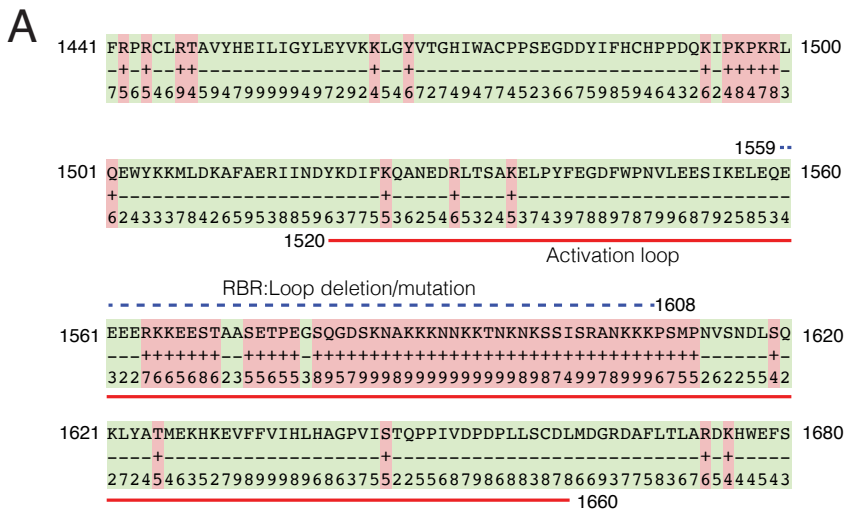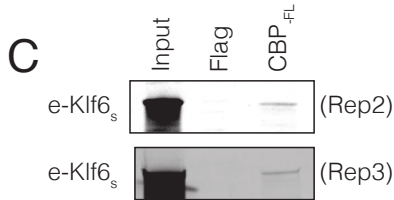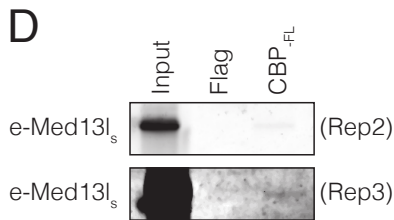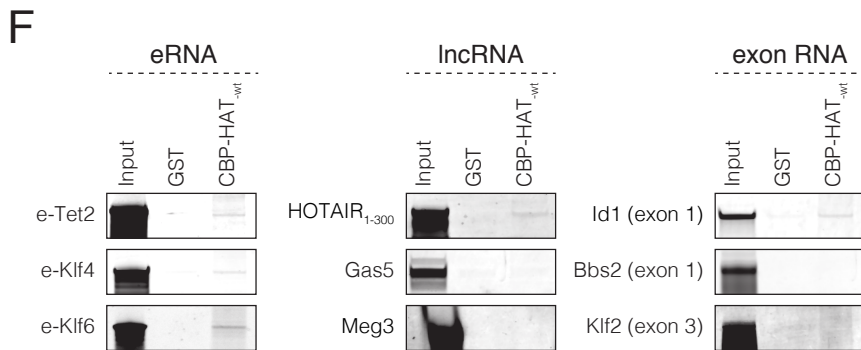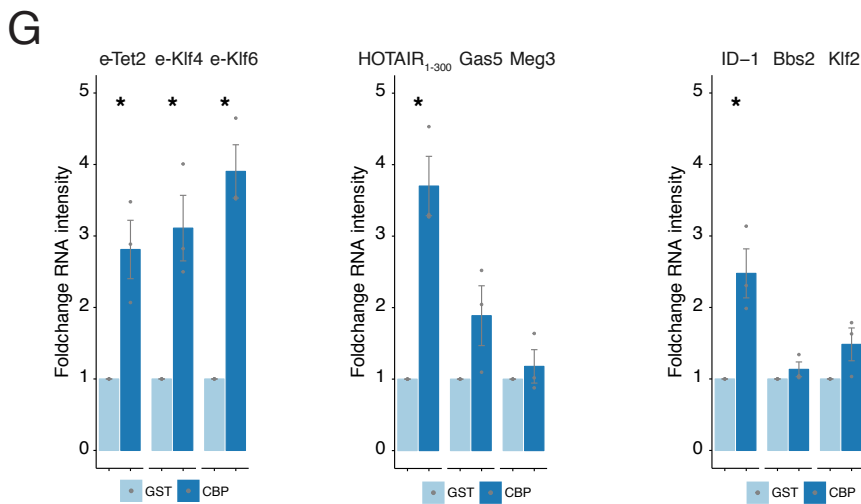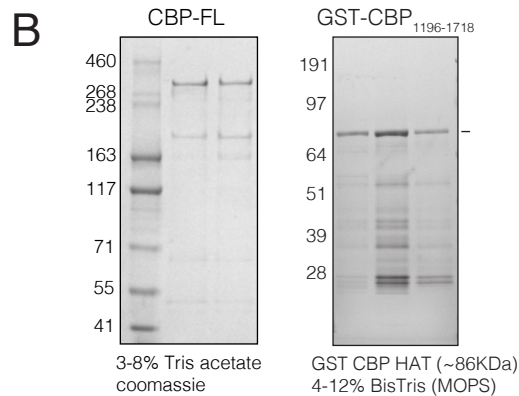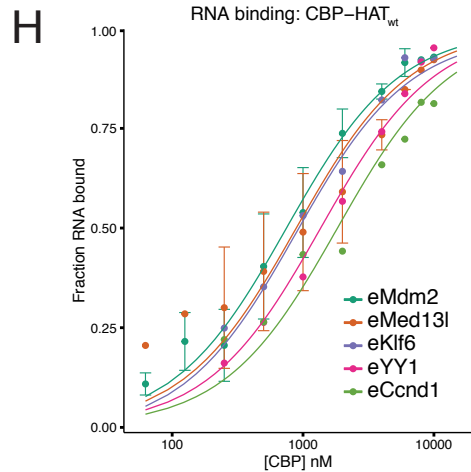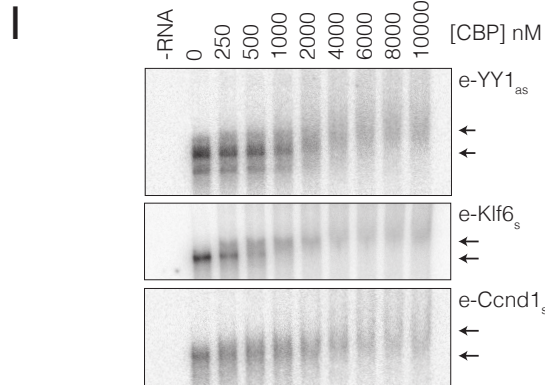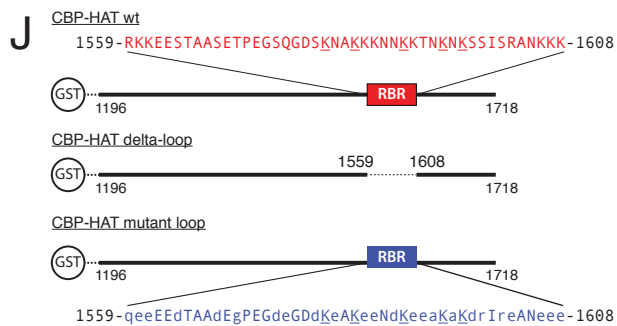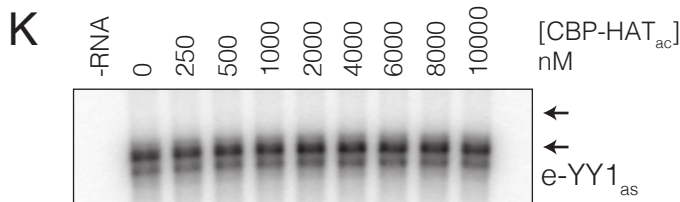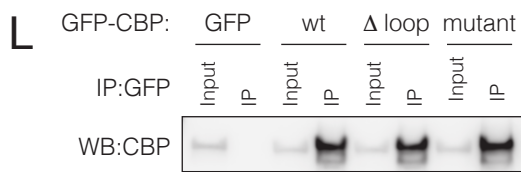

Supplement: NIHMS841005-supplement-1.pdf [file NIHMS841005-supplement-1.pdf]

# Figure S1

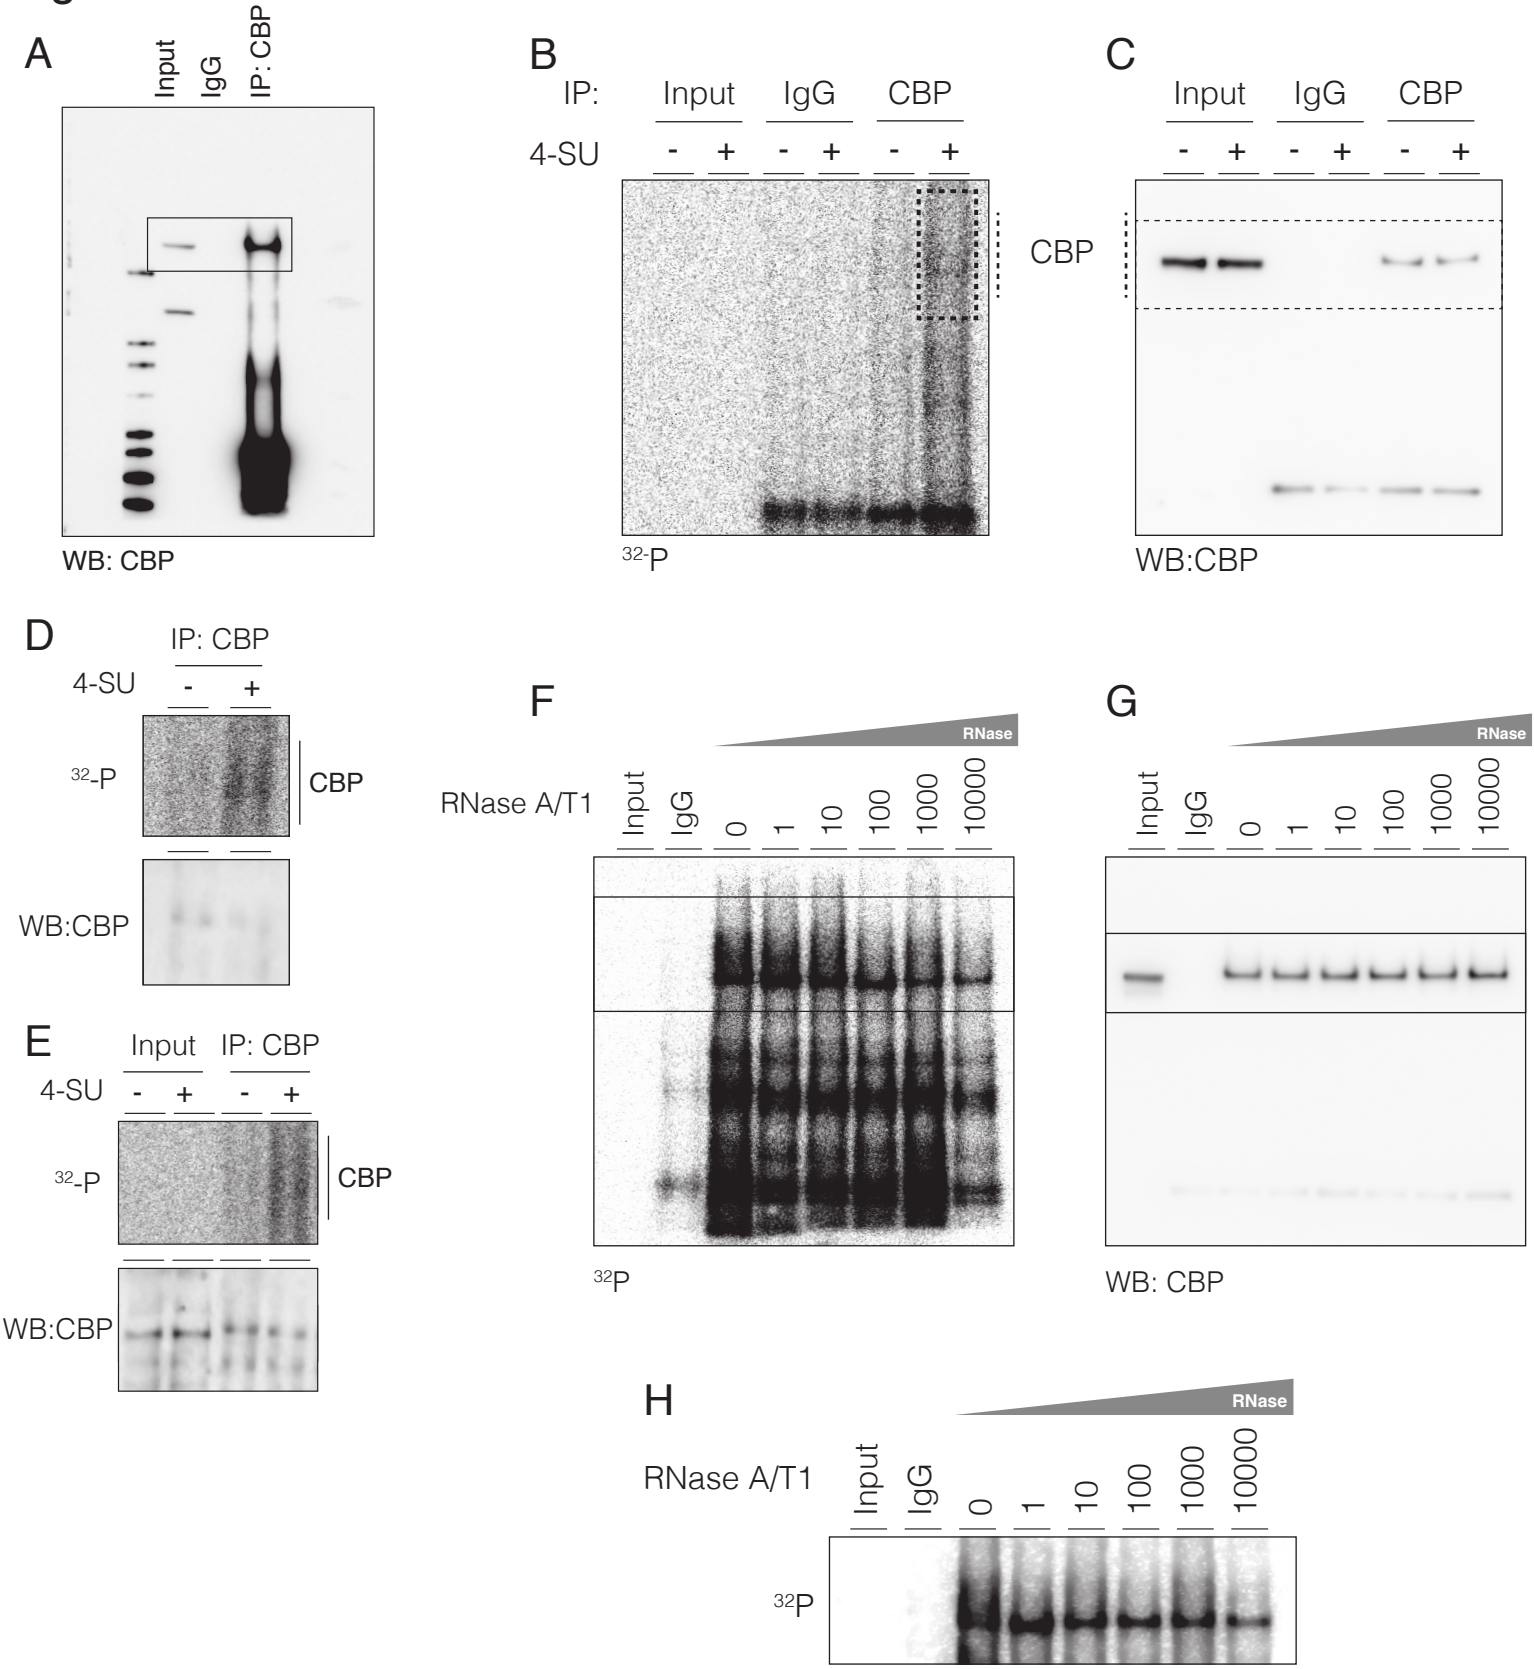

Supplement: NIHMS841005-supplement-2.pdf [file NIHMS841005-supplement-2.pdf]

# Figure S2

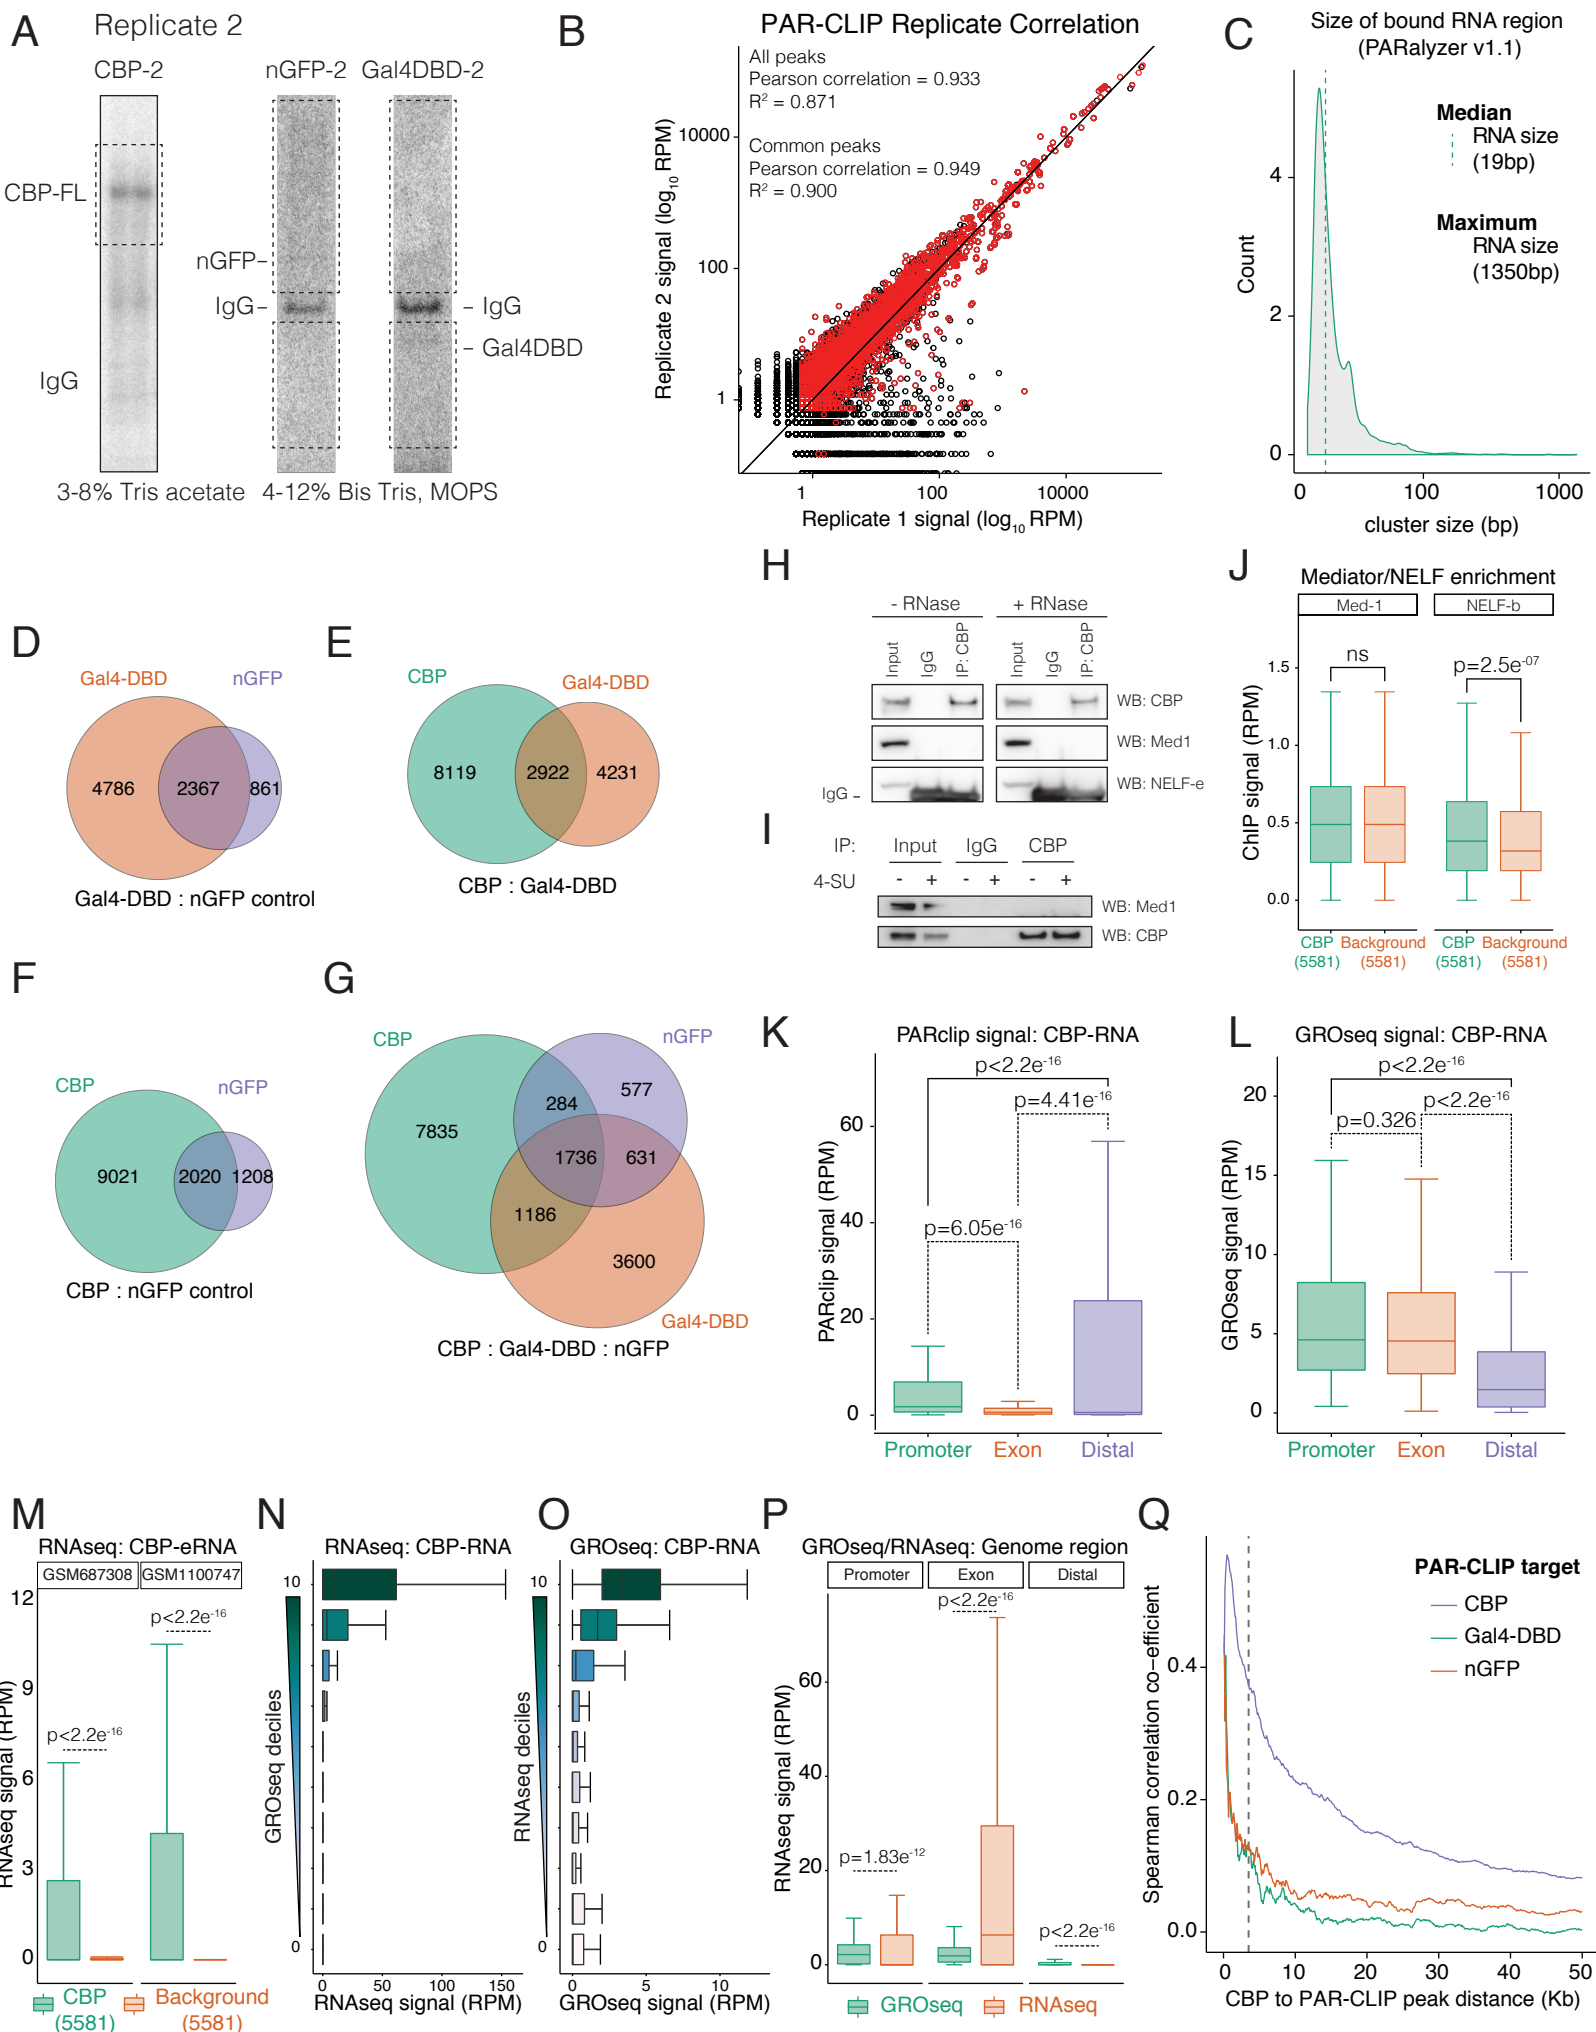

Supplement: NIHMS841005-supplement-3.pdf [file NIHMS841005-supplement-3.pdf]

**Figure S3**

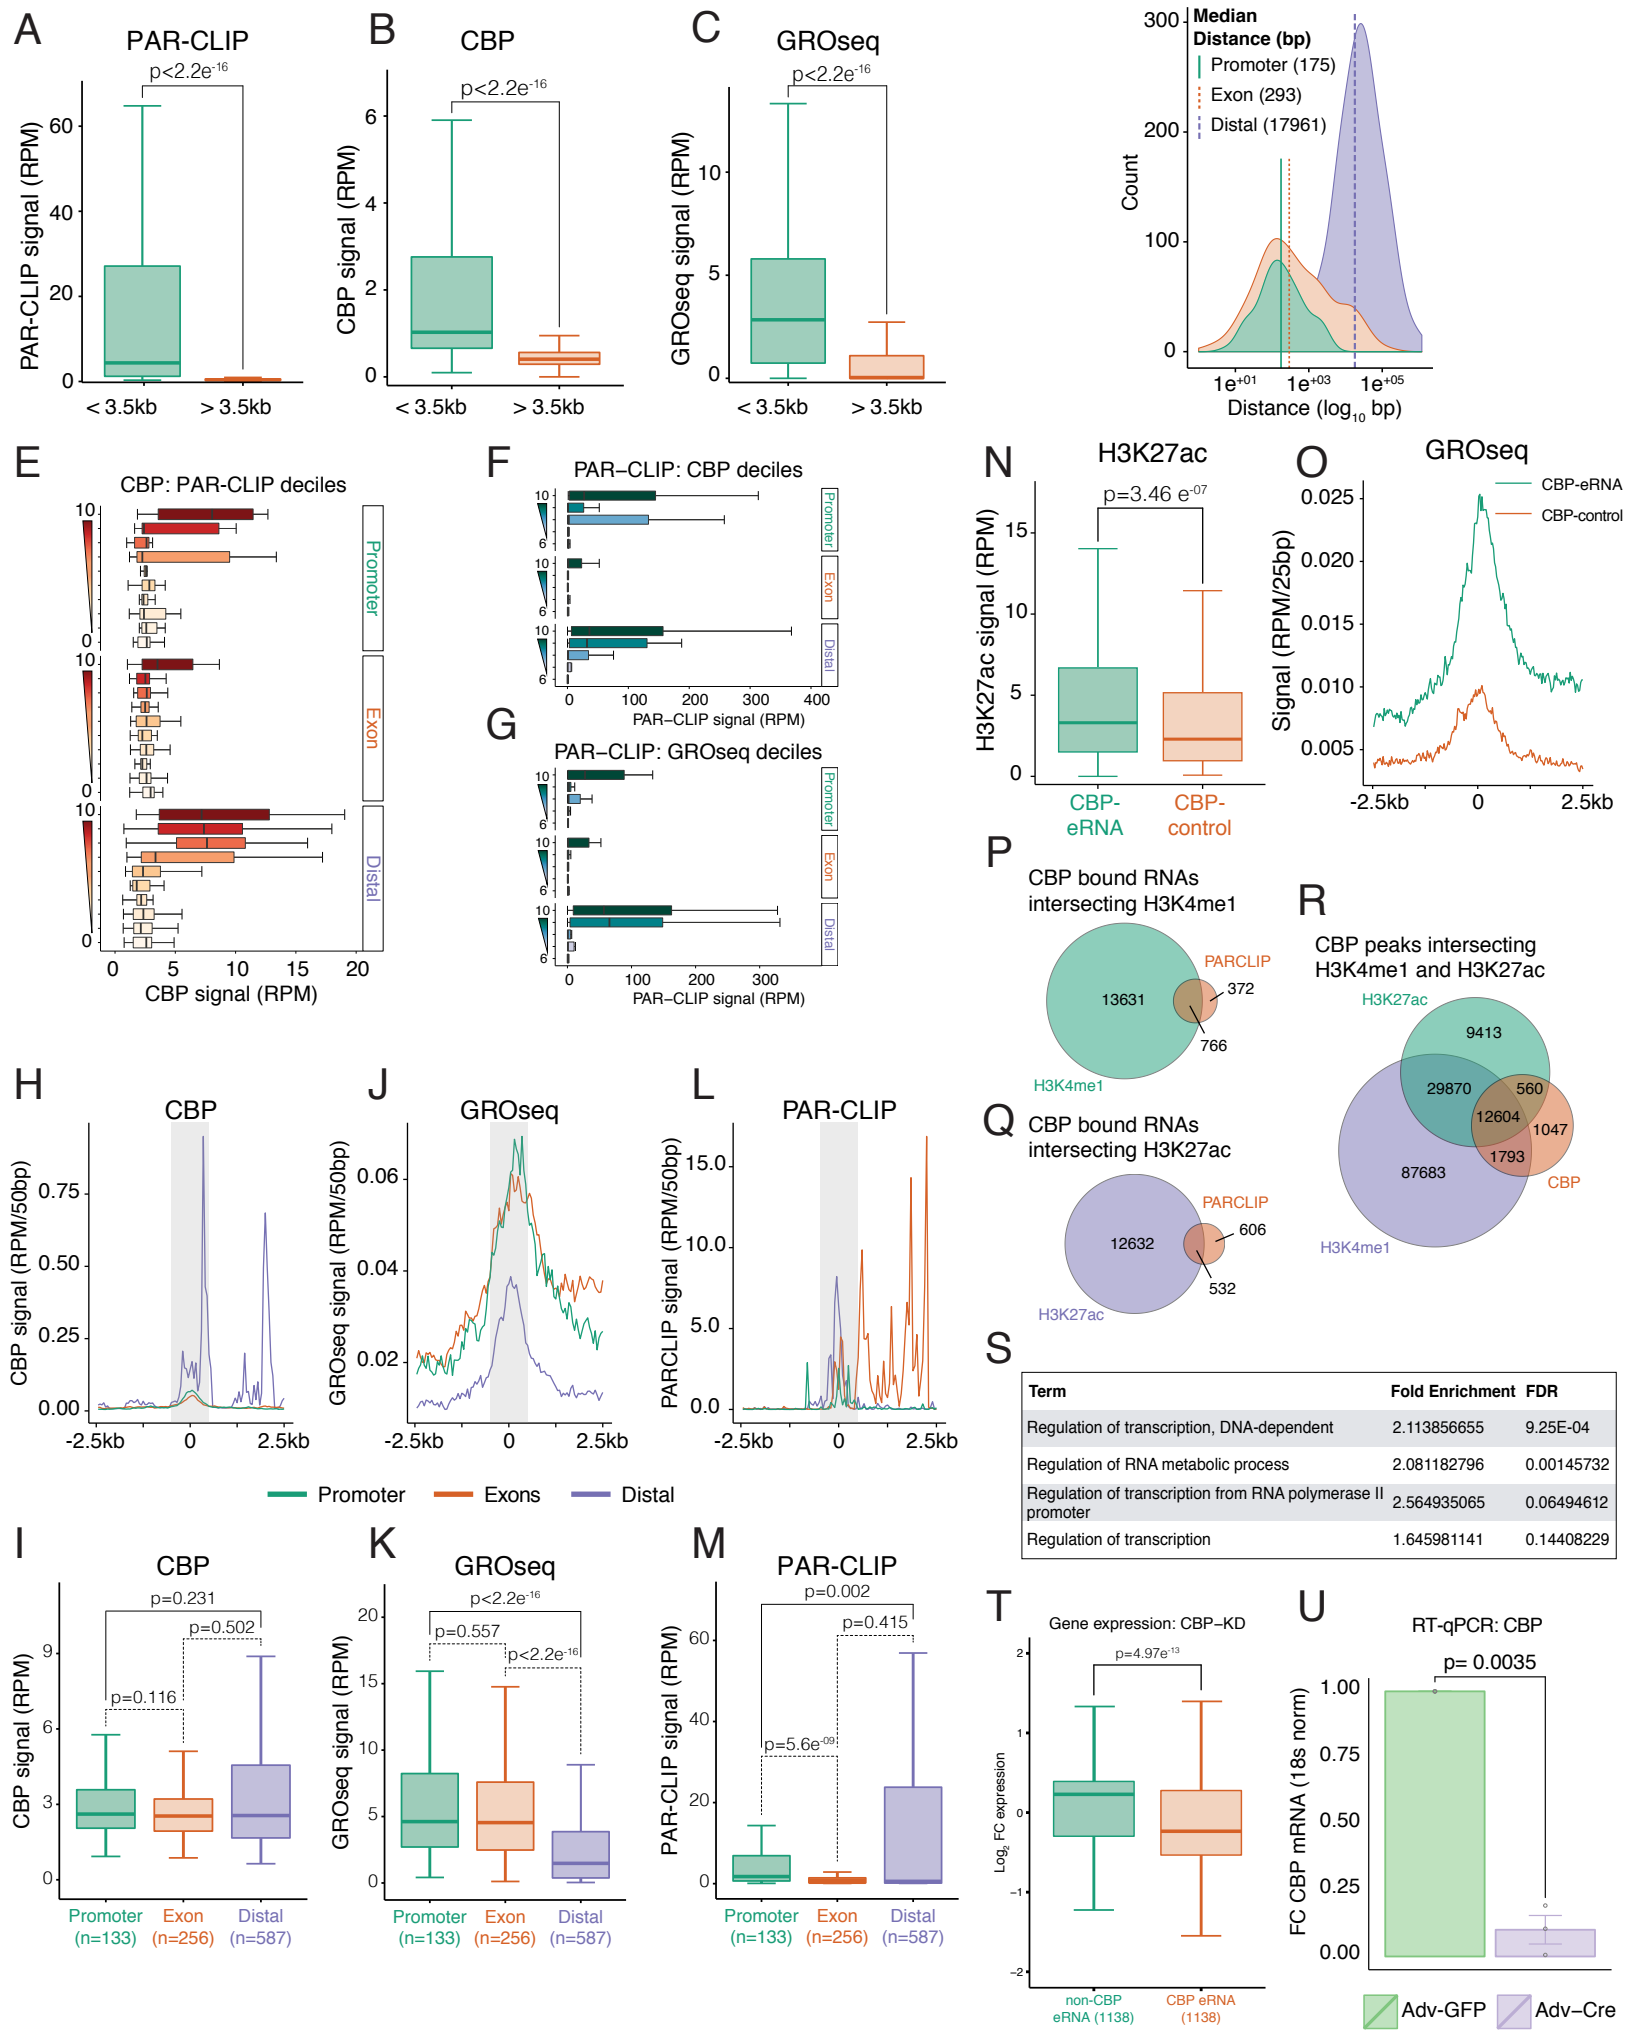

Supplement: NIHMS841005-supplement-4.pdf [file NIHMS841005-supplement-4.pdf]

**Figure S6**

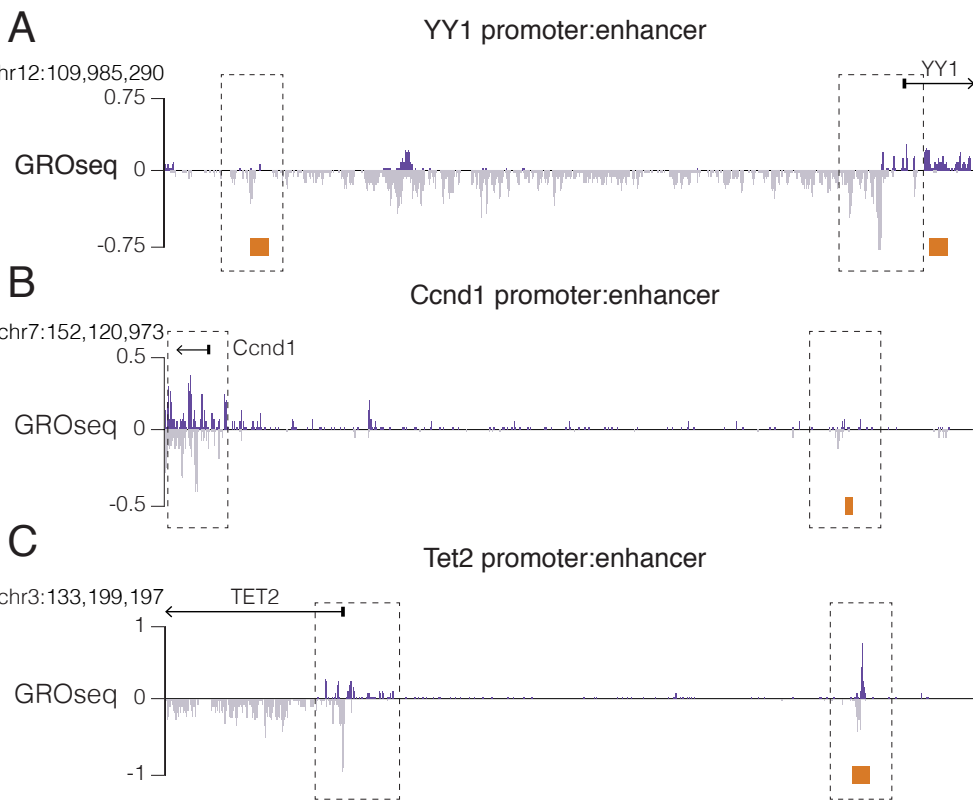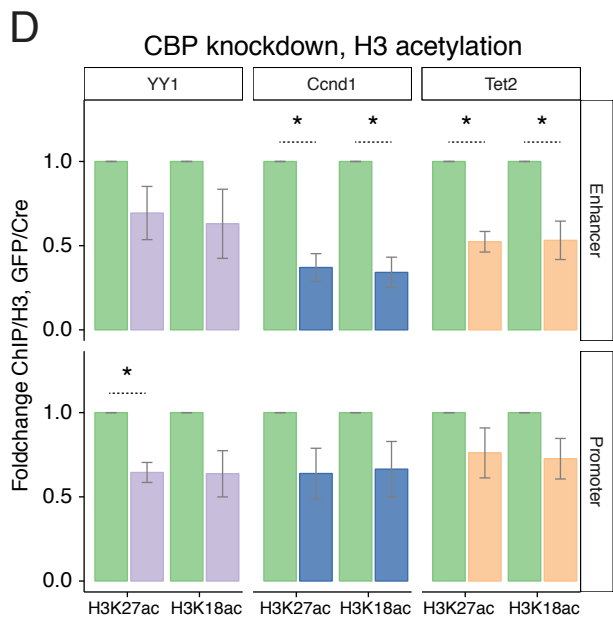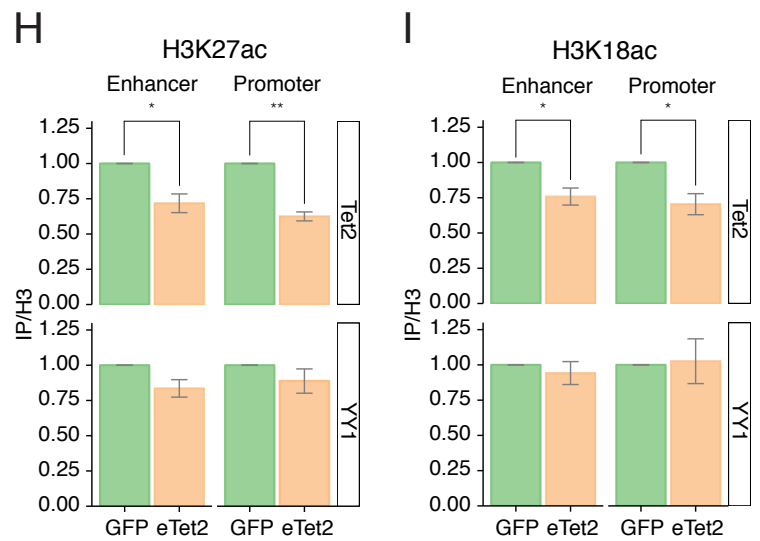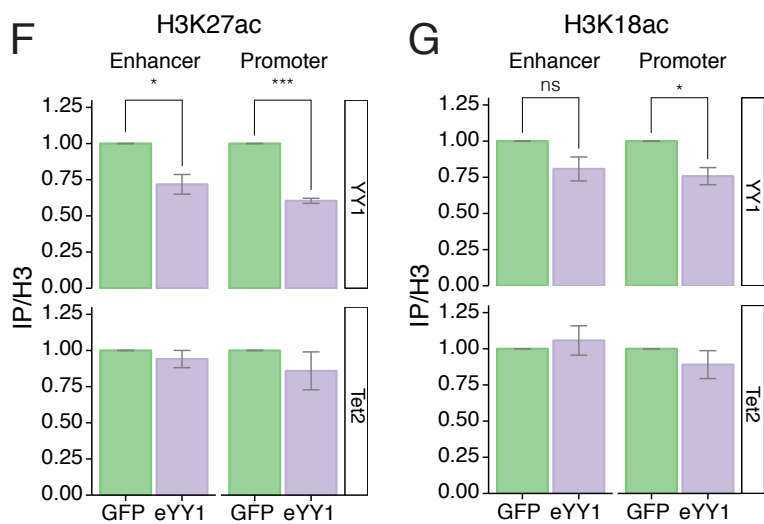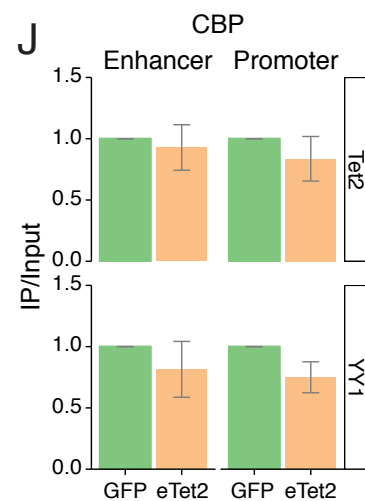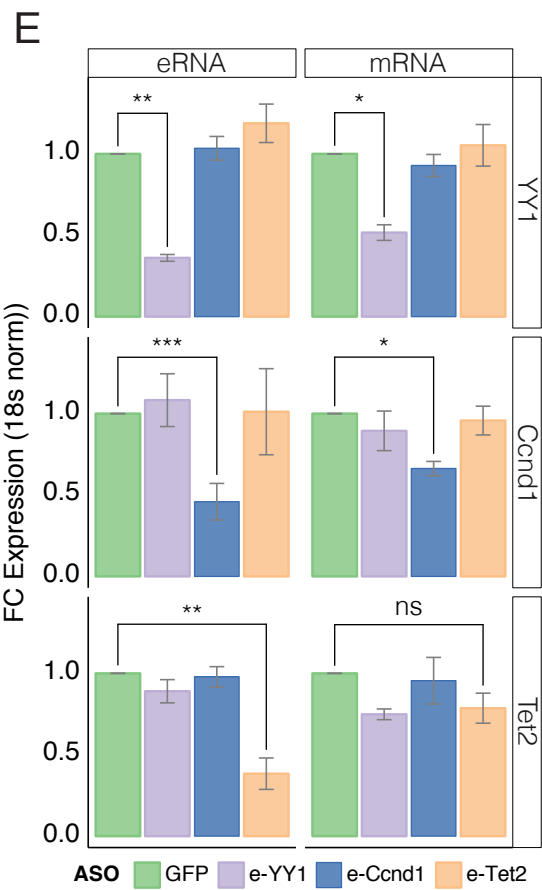

Supplement: NIHMS841005-supplement-6.pdf [file NIHMS841005-supplement-6.pdf]
